# Supplementary material for: The efficacy of treadmill training with and without projected visual context for improving walking ability and reducing fall incidence and fear of falling in older adults with fall-related hip fracture: a randomized controlled trial
Source: Springer Nature journal article supplement (doi:10.1186/s12877-016-0388-x), 2016-12-01
Supplement: MOESM1 [file 11964754]

| SUBGROUP: > 1000m          |                  |                  |                  |                         |                            |
|----------------------------|------------------|------------------|------------------|-------------------------|----------------------------|
| Outcome<br>(n: AT,CT,UPT)  | INTERVENTION     |                  |                  | Difference among groups |                            |
|                            | AT               | CT               | UPT              | P value                 | Effect size ( $\eta_p^2$ ) |
| <b>POMA (0-28)</b>         |                  |                  |                  |                         |                            |
| T0 (5, 7, 13)              | 16.4 ± 3.1       | 15.14 ± 2.4      | 16.6 ± 3.5       | 0.608 <sup>a</sup>      | 0.044                      |
| T1 (5, 7, 13)              | 18.8 ± 1.5       | 19.0 ± 2.4       | 19.4 ± 3.0       | 0.780 <sup>b</sup>      | 0.023                      |
| T2 (4, 7, 11)              | 18.5 ± 3.9       | 19.6 ± 4.5       | 20.4 ± 3.3       | 0.686 <sup>b</sup>      | 0.041                      |
| T3 (3, 5, 8)               | 20.7 ± 5.8       | 22.8 ± 4.7       | 25.1 ± 2.1       | 0.119 <sup>b</sup>      | 0.298                      |
| <b>EMS (0-20)</b>          |                  |                  |                  |                         |                            |
| T0 (5, 7, 13)              | 12.6 ± 3.1       | 10.6 ± 2.6       | 11.5 ± 3.9       | 0.613 <sup>a</sup>      | 0.044                      |
| T1 (5, 7, 13)              | 14.2 ± 3.3       | 16.6 ± 1.6       | 16.4 ± 2.5       | 0.102 <sup>b</sup>      | 0.196                      |
| T2 (4, 7, 11)              | 15.8 ± 3.2       | 15.6 ± 3.2       | 17.6 ± 2.5       | 0.315 <sup>b</sup>      | 0.121                      |
| T3 (3, 5, 8)               | 17.3 ± 4.6       | 17.4 ± 2.4       | 17.9 ± 2.0       | 0.859 <sup>b</sup>      | 0.018                      |
| <b>TUG (s)</b>             |                  |                  |                  |                         |                            |
| T1 (5, 7, 13)              | 32.4 (17.8-37.5) | 21.6 (14.5-48.9) | 21.9 (14.5-36.5) | 0.504 <sup>c</sup>      | -                          |
| T2 (4, 7, 11)              | 23.2 (15.4-27.3) | 23.8 (15.1-37.9) | 22.2 (10.4-34.1) | 0.580 <sup>c</sup>      | -                          |
| <b>FAC (0-5)</b>           |                  |                  |                  |                         |                            |
| T0 (5, 7, 13)              | 2.0 (2.0-3.0)    | 2.0 (2.0-4.0)    | 2.0 (2.0-4.0)    | 0.570 <sup>c</sup>      | -                          |
| $\Delta$ T1 (5, 7, 13)     | 1.0 (1.0-2.0)    | 2.0 (1.0-2.0)    | 1.0 (-1.0-2.0)   | 0.304 <sup>c</sup>      | -                          |
| $\Delta$ T2 (4, 7, 11)     | 1.0 (1.0-2.0)    | 2.0 (0.0-2.0)    | 1.0 (0.0-2.0)    | 0.829 <sup>c</sup>      | -                          |
| $\Delta$ T3 (3, 5, 8)      | 2.0 (1.0-3.0)    | 2.0 (1.0-3.0)    | 2.0 (1.0-3.0)    | 0.943 <sup>c</sup>      | -                          |
| <b>Walking speed (m/s)</b> |                  |                  |                  |                         |                            |
| T1 (5, 7, 13)              | 0.58 ± 0.25      | 0.69 ± 0.25      | 0.67 ± 0.17      | 0.661 <sup>a</sup>      | 0.037                      |
| T2 (4, 7, 11)              | 0.69 ± 0.14      | 0.67 ± 0.22      | 0.75 ± 0.22      | 0.724 <sup>a</sup>      | 0.033                      |
| <b>NEADL (0-66)</b>        |                  |                  |                  |                         |                            |
| T0 (5, 7, 13)              | 52.4 ± 3.4       | 50.4 ± 13.5      | 54.1 ± 6.9       | 0.681 <sup>a</sup>      | 0.034                      |
| T2 (4, 7, 11)              | 31.9 ± 20.9      | 29.6 ± 17.0      | 34.8 ± 16.8      | 0.962 <sup>b</sup>      | 0.004                      |
| T3 (3, 5, 8)               | 41.0 ± 19.2      | 40.6 ± 16.6      | 46.1 ± 9.8       | 0.863 <sup>b</sup>      | 0.024                      |

Measures related to mobility, walking and daily functioning in the adaptability treadmill (AT) group, conventional treadmill (CT) group and usual physical therapy (UPT) group at baseline (T0), directly after (T1), four weeks after (T2) and 12 months (T3) after the intervention. *P* values for group differences were obtained using <sup>a</sup> One-Way ANOVA, <sup>b</sup> ANCOVA with baseline performance as covariate and <sup>c</sup> Kruskal-Wallis test.

| SUBGROUP: < 1000m          |                             |                             |                  |                            |                               |
|----------------------------|-----------------------------|-----------------------------|------------------|----------------------------|-------------------------------|
| Outcome<br>(n: AT,CT,UPT)  | INTERVENTION                |                             |                  | Difference among<br>groups |                               |
|                            | AT                          | CT                          | UPT              | <i>P</i><br>value          | Effect<br>size ( $\eta_p^2$ ) |
| <b>POMA (0-28)</b>         |                             |                             |                  |                            |                               |
| T0 (14, 10, 8)             | 15.2 ± 2.9                  | 15.9 ± 3.8                  | 14.0 ± 5.3       | 0.589 <sup>a</sup>         | 0.036                         |
| T1 (14, 10, 8)             | 19.6 ± 2.3 <sup>*</sup>     | 20.1 ± 1.7 <sup>*</sup>     | 17.3 ± 4.1       | 0.086 <sup>b</sup>         | 0.160                         |
| T2 (13, 10, 6)             | 20.8 ± 1.5                  | 21.4 ± 3.2                  | 17.8 ± 4.2       | 0.116 <sup>b</sup>         | 0.158                         |
| T3 (5, 7, 6)               | 23.4 ± 2.3                  | 24.1 ± 2.5 <sup>*</sup>     | 20.3 ± 3.6       | 0.059 <sup>b</sup>         | 0.333                         |
| <b>EMS (0-20)</b>          |                             |                             |                  |                            |                               |
| T0 (14, 10, 8)             | 10.7 ± 3.9                  | 11.4 ± 3.8                  | 9.5 ± 3.2        | 0.558 <sup>a</sup>         | 0.039                         |
| T1 (14, 10, 8)             | 15.6 ± 1.9 <sup>*</sup>     | 16.4 ± 1.6 <sup>*</sup>     | 13.3 ± 3.4       | <b>0.033</b> <sup>b</sup>  | 0.216                         |
| T2 (13, 10, 6)             | 16.3 ± 2.5                  | 16.8 ± 1.8                  | 14.0 ± 4.1       | 0.244 <sup>b</sup>         | 0.107                         |
| T3 (5, 7, 6)               | 17.0 ± 1.9                  | 18.6 ± 1.3                  | 17.2 ± 2.1       | 0.207 <sup>b</sup>         | 0.202                         |
| <b>TUG (s)</b>             |                             |                             |                  |                            |                               |
| T1 (14, 10, 8)             | 25.8 (13.5-60.7)            | 24.6 (13.6-37.7)            | 27.2 (13.3-79.9) | 0.571 <sup>c</sup>         | -                             |
| T2 (13, 10, 6)             | 19.3 (11.9-49.3)            | 20.3 (10.4-88.9)            | 27.9 (12.9-42.2) | 0.839 <sup>c</sup>         | -                             |
| <b>FAC (0-5)</b>           |                             |                             |                  |                            |                               |
| T0 (14, 10, 8)             | 2.5 (2.0-4.0) <sup>†</sup>  | 2.0 (2.0-2.0)               | 2.0 (2.0-3.0)    | <b>0.014</b> <sup>c</sup>  | -                             |
| ΔT1 (14, 10, 8)            | 1.0 (0.0-2.0) <sup>††</sup> | 2.0 (2.0-2.0) <sup>**</sup> | 1.0 (0.0-2.0)    | <b>0.010</b> <sup>c</sup>  | -                             |
| ΔT2 (13, 10, 6)            | 1.0 (0.0-2.0) <sup>††</sup> | 2.0 (2.0-3.0)               | 1.5 (0.0-3.0)    | <b>0.021</b> <sup>c</sup>  | -                             |
| ΔT3 (5, 7, 6)              | 1.0 (0.0-3.0)               | 2.0 (2.0-3.0)               | 2.0 (2.0-3.0)    | 0.148 <sup>c</sup>         | -                             |
| <b>Walking speed (m/s)</b> |                             |                             |                  |                            |                               |
| T1 (14, 10, 8)             | 0.67 ± 0.22                 | 0.78 ± 0.25                 | 0.56 ± 0.25      | 0.149 <sup>a</sup>         | 0.123                         |
| T2 (13, 10, 6)             | 0.75 ± 0.22                 | 0.75 ± 0.28                 | 0.67 ± 0.31      | 0.757 <sup>a</sup>         | 0.021                         |
| <b>NEADL (0-66)</b>        |                             |                             |                  |                            |                               |
| T0 (13, 10, 8)             | 41.0 ± 9.5                  | 36.9 ± 10.1                 | 42.3 ± 12.6      | 0.518 <sup>a</sup>         | 0.046                         |
| T2 (13, 10, 6)             | 32.4 ± 15.8 <sup>†</sup>    | 42.1 ± 12.2 <sup>**</sup>   | 30.8 ± 23.1      | <b>0.006</b> <sup>b</sup>  | 0.336                         |
| T3 (5, 7, 6)               | 44.0 ± 7.1                  | 43.0 ± 9.1                  | 39.7 ± 13.5      | 0.355 <sup>b</sup>         | 0.137                         |

Measures related to mobility, walking and daily functioning in the adaptability treadmill (AT) group, conventional treadmill (CT) group and usual physical therapy (UPT) group at baseline (T0), directly after (T1), four weeks after (T2) and 12 months (T3) after the intervention. *P* values for group differences were obtained using <sup>a</sup> One-Way ANOVA, <sup>b</sup> ANCOVA with baseline performance as covariate and <sup>c</sup> Kruskal-Wallis test.

Significant group effects are presented in bold ( $p < 0.05$ ). Post-hoc tests:

\*\* Significantly different from usual physical therapy (UPT) ( $p < 0.01$ )

\* Trend towards different from usual physical therapy (UPT) ( $p < 0.05$ )

†† Significantly different from conventional treadmill training (CT) ( $p < 0.01$ )

† Trend towards different from conventional treadmill training (CT) ( $p < 0.05$ )

| SUBGROUP: > 1000m                |                    |                    |                   |                         |                            |
|----------------------------------|--------------------|--------------------|-------------------|-------------------------|----------------------------|
| Outcome<br>(n: AT, CT, UPT)      | INTERVENTION       |                    |                   | Difference among groups |                            |
|                                  | AT                 | CT                 | UPT               | P value                 | Effect size ( $\eta_p^2$ ) |
| <b>Obstacle effect (%)</b>       |                    |                    |                   |                         |                            |
| T1 (5, 7, 13)                    | -20.4 ± 13.8       | -17.1 ± 10.7       | -27.7 ± 15.4      | 0.258 <sup>a</sup>      | 0.116                      |
| T2 (4, 7, 11)                    | -27.0 ± 7.0        | -23.5 ± 10.6       | -21.2 ± 10.6      | 0.623 <sup>a</sup>      | 0.049                      |
| <b>Obstacle success rate (%)</b> |                    |                    |                   |                         |                            |
| T1 (5, 7, 13)                    | 100.0 (66.7-100.0) | 83.3 (0.0-100.0)   | 83.3 (0.0-100.0)  | 0.403 <sup>b</sup>      | -                          |
| T2 (4, 7, 11)                    | 100.0 (66.7-100.0) | 100.0 (33.3-100.0) | 86.4(33.3-100.0)  | 0.931 <sup>b</sup>      | -                          |
| <b>DTE- walking speed (%)</b>    |                    |                    |                   |                         |                            |
| T1 (5, 7, 13)                    | -18.0 ± 26.0       | -28.6 ± 21.1       | -37.7 ± 10.1      | 0.109 <sup>a</sup>      | 0.182                      |
| T2 (4, 7, 11)                    | -24.3 ± 28.6       | -38.0 ± 18.9       | -24.6 ± 17.2      | 0.353 <sup>a</sup>      | 0.104                      |
| <b>DTE- subtractions (%)</b>     |                    |                    |                   |                         |                            |
| T1 (5, 7, 13)                    | 4.8 (-100.0-48.7)  | 0.0 (-30.1-26.8)   | -0.2 (-29.7-48.0) | 0.941 <sup>b</sup>      | -                          |
| T2 (4, 7, 11)                    | -14.1(-100.0-36.4) | 0 (-12.9-59.7)     | 9.4 (-46.0-677.9) | 0.641 <sup>b</sup>      | -                          |

Measures related to obstacle avoidance performance and dual-task effects (DTE) in the adaptability treadmill (AT) group, conventional treadmill (CT) group and usual physical therapy (UPT) group directly after (T1) and four weeks after (T2) intervention. *P* values for group differences were obtained using <sup>a</sup>One-Way ANOVA and <sup>b</sup>Kruskal-Wallis test.

| SUBGROUP: < 1000M                |                           |                           |                     |                          |                            |
|----------------------------------|---------------------------|---------------------------|---------------------|--------------------------|----------------------------|
| Outcome<br>(n: AT, CT, UPT)      | INTERVENTION              |                           |                     | Difference among groups  |                            |
|                                  | AT                        | CT                        | UPT                 | P value                  | Effect size ( $\eta_p^2$ ) |
| <b>Obstacle effect (%)</b>       |                           |                           |                     |                          |                            |
| T1 (14, 10, 8)                   | -17.1 ± 10.2              | -23.9 ± 11.1              | -18.9 ± 11.5        | 0.330 <sup>a</sup>       | 0.074                      |
| T2 (13, 10, 6)                   | -19.8 ± 10.1              | -25.0 ± 13.6              | -22.4 ± 17.4        | 0.637 <sup>a</sup>       | 0.034                      |
| <b>Obstacle success rate (%)</b> |                           |                           |                     |                          |                            |
| T1 (14, 10, 8)                   | 100.0 (16.7-100.0)        | 100.0 (50.0-100.0)        | 75.0(0.0-100.0)     | 0.198 <sup>b</sup>       | -                          |
| T2 (13, 10, 6)                   | 100.0 (33.3-100.0)        | 91.7 (16.7-100.0)         | 91.7 (66.7-100.0)   | 0.696 <sup>b</sup>       | -                          |
| <b>DTE- walking speed (%)</b>    |                           |                           |                     |                          |                            |
| T1 (13, 10, 8)                   | -22.8 ± 15.3 <sup>†</sup> | -41.0 ± 15.7 <sup>*</sup> | -22.2 ± 18.6        | <b>0.023<sup>a</sup></b> | 0.237                      |
| T2 (12, 10, 6)                   | -22.4 ± 13.1              | -28.1 ± 16.1 <sup>*</sup> | -11.1 ± 7.4         | 0.067 <sup>a</sup>       | 0.195                      |
| <b>DTE- subtractions (%)</b>     |                           |                           |                     |                          |                            |
| T1 (12, 10, 8)                   | 5.1 (-100.0-208.0)        | 2.0 (-62.8-55.6)          | -22.1 (-100.0-58.8) | 0.488 <sup>b</sup>       | -                          |
| T2 (12, 10, 6)                   | -3.9 (-100.0-120.2)       | 20.8 (-26.2-77.3)         | -10.9 (-100.0-31.3) | 0.256 <sup>b</sup>       | -                          |

Measures related to obstacle avoidance performance and dual-task effects (DTE) in the adaptability treadmill (AT) group, conventional treadmill (CT) group and usual physical therapy (UPT) group directly after (T1) and four weeks after (T2) intervention. *P* values for group differences were obtained using <sup>a</sup> One-Way ANOVA and <sup>b</sup> Kruskal-Wallis test.

Significant group effects are presented in bold ( $p < 0.05$ ). Post-hoc tests:

\* Trend towards different from usual physical therapy (UPT) ( $p < 0.05$ )

† Trend towards different from conventional treadmill training (CT) ( $p < 0.05$ )

| SUBGROUP: > 1000m           |                            |                           |                    |                          |                            |
|-----------------------------|----------------------------|---------------------------|--------------------|--------------------------|----------------------------|
| Outcome<br>(n: AT, CT, UPT) | INTERVENTION               |                           |                    | Difference among groups  |                            |
|                             | AT                         | CT                        | UPT                | P value                  | Effect size ( $\eta_p^2$ ) |
| <b>FES-I (20-80)</b>        |                            |                           |                    |                          |                            |
| T0 (5, 7, 13)               | 40.6 ± 7.1                 | 49.6 ± 12.7               | 45.5 ± 16.5        | 0.565 <sup>a</sup>       | 0.051                      |
| T1 (5, 7, 13)               | 50.4 ± 21.1 <sup>*††</sup> | 31.9 ± 12.0               | 34.5 ± 11.2        | <b>0.015<sup>b</sup></b> | 0.331                      |
| T2 (4, 7, 11)               | 53.0 ± 15.3 <sup>*†</sup>  | 36.6 ± 11.7               | 34.7 ± 12.6        | 0.057 <sup>b</sup>       | 0.273                      |
| T3 (3, 5, 8)                | 43.3 ± 21.5 <sup>*</sup>   | 28.8 ± 5.8                | 24.8 ± 3.5         | <b>0.046<sup>b</sup></b> | 0.401                      |
| <b>VAS (0-100)</b>          |                            |                           |                    |                          |                            |
| T0 (5, 7, 13)               | 71.5 ± 14.8                | 72.9 ± 18.3               | 62.7 ± 18.7        | 0.418 <sup>a</sup>       | 0.076                      |
| T1 (5, 7, 13)               | 85.0 ± 15.0                | 75.6 ± 19.7               | 78.1 ± 17.8        | 0.667 <sup>b</sup>       | 0.038                      |
| T2 (4, 7, 11)               | 87.3 ± 11.7                | 75.7 ± 13.7               | 82.1 ± 15.3        | 0.337 <sup>b</sup>       | 0.114                      |
| T3 (3, 5, 7)                | 66.7 ± 15.3                | 83.7 ± 13.7               | 76.4 ± 12.5        | 0.129 <sup>b</sup>       | 0.311                      |
| <b>HOOS-Q (0-100)</b>       |                            |                           |                    |                          |                            |
| T2 (4, 7, 11)               | 40.6 ± 23.7                | 50.0 ± 24.5               | 55.7 ± 23.8        | 0.565 <sup>a</sup>       | 0.058                      |
| T3 (3, 5, 8)                | 62.5 ± 33.1                | 78.8 ± 25.6               | 83.6 ± 18.0        | 0.432 <sup>a</sup>       | 0.121                      |
| <b>TMTa (s)</b>             |                            |                           |                    |                          |                            |
| T0 (5, 7, 13)               | 76.2 (48.8-148.0)          | 101.6 (50.8-127.0)        | 105.0 (49.0-177.0) | 0.436 <sup>c</sup>       | -                          |
| T1 (5, 7, 13)               | 75.1 ± 32.0                | 96.5 ± 54.0               | 80.5 ± 36.8        | 0.358 <sup>b</sup>       | 0.093                      |
| T2 (4, 7, 11)               | 59.4 ± 20.0                | 116.9 ± 85.7 <sup>*</sup> | 64.3 ± 20.6        | 0.092 <sup>b</sup>       | 0.233                      |
| T3 (3, 5, 8)                | 62.1 ± 4.7                 | 81.5 ± 52.5               | 84.1 ± 40.5        | 0.958 <sup>b</sup>       | 0.007                      |
| <b>TMTb (s)</b>             |                            |                           |                    |                          |                            |
| T0 (5, 7, 13)               | 182.0 (100.0-300.0)        | 300.0 (110.8-300.0)       | 247.0 (80.0-300.0) | 0.213 <sup>c</sup>       | -                          |
| T1 (5, 7, 13)               | 188.3 ± 94.9               | 236.7 ± 75.7              | 193.2 ± 81.1       | 0.653 <sup>b</sup>       | 0.040                      |
| T2 (4, 7, 11)               | 177.0 ± 89.1               | 219.6 ± 82.5              | 189.4 ± 90.3       | 0.895 <sup>b</sup>       | 0.012                      |
| T3 (3, 5, 8)                | 212.3 ± 92.1               | 193.8 ± 86.3              | 215.0 ± 92.9       | 0.348 <sup>b</sup>       | 0.161                      |

Measures related to fear of falling and general health in the adaptability treadmill (AT) group, conventional treadmill (CT) group and usual physical therapy (UPT) group at baseline (T0), directly after (T1), four weeks after (T2) and 12 months (T3) after the intervention. *P* values for group differences were obtained using <sup>a</sup> One-Way ANOVA, <sup>b</sup> ANCOVA with baseline performance as covariate and <sup>c</sup> Kruskal-Wallis test.

Significant group effects are presented in bold ( $p < 0.05$ ). Post-hoc tests:

\* Trend towards different from usual physical therapy (UPT) ( $p < 0.05$ )

†† Significantly different from conventional treadmill training (CT) ( $p < 0.01$ )

† Trend towards different from conventional treadmill training (CT) ( $p < 0.05$ )

| SUBGROUP: < 1000m           |                          |                    |                    |                         |                            |
|-----------------------------|--------------------------|--------------------|--------------------|-------------------------|----------------------------|
| Outcome<br>(n: AT, CT, UPT) | INTERVENTION             |                    |                    | Difference among groups |                            |
|                             | AT                       | CT                 | UPT                | P value                 | Effect size ( $\eta_p^2$ ) |
| <b>FES-I (20-80)</b>        |                          |                    |                    |                         |                            |
| T0 (14, 10, 8)              | 46.1 ± 13.6              | 41.3 ± 12.7        | 48.1 ± 12.4        | 0.514 <sup>a</sup>      | 0.045                      |
| T1 (14, 10, 8)              | 41.9 ± 13.8              | 39.3 ± 14.5        | 48.8 ± 17.1        | 0.586 <sup>b</sup>      | 0.037                      |
| T2 (13, 10, 6)              | 38.5 ± 12.7              | 38.9 ± 16.5        | 47.5 ± 22.4        | 0.497 <sup>b</sup>      | 0.054                      |
| T3 (5, 7, 6)                | 24.6 ± 6.1               | 28.4 ± 6.5         | 31.2 ± 8.1         | 0.491 <sup>b</sup>      | 0.097                      |
| <b>VAS (0-100)</b>          |                          |                    |                    |                         |                            |
| T0 (14, 10, 8)              | 58.5 ± 18.6              | 64.3 ± 19.4        | 57.1 ± 25.1        | 0.718 <sup>a</sup>      | 0.023                      |
| T1 (13, 10, 8)              | 79.2 ± 16.7              | 84.2 ± 12.5        | 73.3 ± 14.4        | 0.382 <sup>b</sup>      | 0.069                      |
| T2 (13, 10, 6)              | 78.8 ± 20.0              | 84.6 ± 15.1        | 65.5 ± 13.6        | 0.152 <sup>b</sup>      | 0.140                      |
| T3 (5, 7, 6)                | 85.0 ± 15.8              | 82.3 ± 10.6        | 79.1 ± 13.0        | 0.796 <sup>b</sup>      | 0.032                      |
| <b>HOOS-Q (0-100)</b>       |                          |                    |                    |                         |                            |
| T2 (13, 10, 6)              | 59.1 ± 31.3              | 62.5 ± 22.4        | 40.6 ± 8.6         | 0.235 <sup>a</sup>      | 0.105                      |
| T3 (5, 7, 6)                | 85.0 ± 14.4              | 64.3 ± 21.0        | 71.9 ± 20.4        | 0.217 <sup>a</sup>      | 0.184                      |
| <b>TMTa (s)</b>             |                          |                    |                    |                         |                            |
| T0 (14, 10, 8)              | 98.5 (41.0-262.0)        | 98.0 (47.2-164.0)  | 75.0 (27.0-300)    | 0.643 <sup>c</sup>      | -                          |
| T1 (14, 10, 8)              | 93.7 ± 45.2              | 74.3 ± 20.7        | 95.8 ± 85.5        | 0.223 <sup>b</sup>      | 0.102                      |
| T2 (12, 10, 6)              | 85.3 ± 42.5              | 84.5 ± 60.2        | 92.2 ± 79.6        | 0.966 <sup>b</sup>      | 0.003                      |
| T3 (5, 7, 6)                | 53.6 ± 18.5 <sup>*</sup> | 80.6 ± 34.9        | 84.2 ± 44.4        | 0.056 <sup>b</sup>      | 0.338                      |
| <b>TMTb (s)</b>             |                          |                    |                    |                         |                            |
| T0 (13, 10, 8)              | 299.0 (112.0-300.0)      | 231.0 (82.6-300.0) | 200.0 (93.0-300.0) | 0.797 <sup>c</sup>      | -                          |
| T1 (13,10, 8)               | 228.7 ± 86.4             | 194.6 ± 79.3       | 212.6 ± 102.8      | 0.418 <sup>b</sup>      | 0.063                      |
| T2 (11, 10, 6)              | 205.7 ± 93.4             | 198.2 ± 86.3       | 195.4 ± 115.1      | 0.917 <sup>b</sup>      | 0.007                      |
| T3 (4, 7, 6)                | 191.7 ± 79.5             | 209.2 ± 100.0      | 196.9 ± 105.2      | 0.477 <sup>b</sup>      | 0.108                      |

Measures related to fear of falling and general health in the adaptability treadmill (AT) group, conventional treadmill (CT) group and usual physical therapy (UPT) group at baseline (T0), directly after (T1), four weeks after (T2) and 12 months (T3) after the intervention. *P* values for group differences were obtained using <sup>a</sup> One-Way ANOVA, <sup>b</sup> ANCOVA with baseline performance as covariate and <sup>c</sup> Kruskal-Wallis test.  
<sup>\*</sup> Post-hoc test showed a trend towards different from usual physical therapy (UPT) (*p*<0.05)

**SUBGROUP: > 1000m**

|                                                | <b>AT<br/>(n=4)</b>          | <b>CT<br/>(n=7)</b> | <b>UPT<br/>(n=10)</b> |
|------------------------------------------------|------------------------------|---------------------|-----------------------|
| Number of falls                                | 1                            | 0                   | 9                     |
| Observation time, person-years                 | 4.0                          | 6.6                 | 9.6                   |
| Fall incidence rate, falls/person-years        | 0.25                         | 0.0                 | 0.92                  |
| Number (%) of fallers                          | 1 (25.0)                     | 0 (0)               | 5 (50.0)              |
| Incidence rate ratio (95% CI), relative to UPT | 0.27(0.03– 2.9, $p=0.281$ )  | -                   |                       |
| Relative risk (95% CI), relative to UPT        | 0.50 (0.08- 3.0, $p=0.580$ ) | - ( $p=0.04$ )      |                       |

Abbreviations. AT: adaptability treadmill, CT: conventional treadmill, UPT: usual physical therapy, CI: confidence interval.

**SUBGROUP: < 1000m**

|                                                | <b>AT<br/>(n=10)</b>         | <b>CT<br/>(n=9)</b>          | <b>UPT<br/>(n=6)</b> |
|------------------------------------------------|------------------------------|------------------------------|----------------------|
| Number of falls                                | 10                           | 11                           | 11                   |
| Observation time, person-years                 | 9.5                          | 8.6                          | 5.9                  |
| Fall incidence rate, falls/person-years        | 1.04                         | 1.39                         | 1.91                 |
| Number (%) of fallers                          | 3 (30.0)                     | 5 (55.6)                     | 4(66.7)              |
| Incidence rate ratio (95% CI), relative to UPT | 0.55(0.14– 2.06, $p=0.371$ ) | 0.73 (0.19-2.75, $p=0.640$ ) |                      |
| Relative risk (95% CI), relative to UPT        | 0.45 (0.15-1.36, $p=0.302$ ) | 0.83 (0.37-1.88, $p=1.000$ ) |                      |

Abbreviations. AT: adaptability treadmill, CT: conventional treadmill, UPT: usual physical therapy, CI: confidence interval.
